# Supplementary material for: Designed synthesis of TiO2-modified iron oxides on/among carbon nanotubes as a superior lithium-ion storage material
Source: Royal Society of Chemistry journal article supplement (doi:10.1039/c4ta01596g), 2014-01-01
Supplement: c4ta01596g1.pdf [file c4ta01596g1.pdf]

## Supporting Information

# Designed synthesis of TiO<sub>2</sub>-modified iron oxides on/among carbon nanotubes as a superior lithium-ion storage material

*Jinlong Liu,<sup>a,b</sup> Dong Qian,<sup>\*a,b</sup> Haibo Feng,<sup>a</sup> Junhua Li,<sup>a</sup> Jianbo Jiang,<sup>a</sup> Sanjun Peng,<sup>a</sup> and Youcai Liu<sup>\*a</sup>*

<sup>a</sup> College of Chemistry and Chemical Engineering, Central South University,  
Changsha 410083, PR China

<sup>b</sup> State Key Laboratory of Powder Metallurgy, Central South University, Changsha  
410083, PR China.

\* Corresponding author. Telephone: +86-731-88879616. Fax: +86-731-88879616. E-mail: [qiandong6@vip.sina.com](mailto:qiandong6@vip.sina.com) (D.Q.); [liuyoucai@126.com](mailto:liuyoucai@126.com) (Y.C.L.).

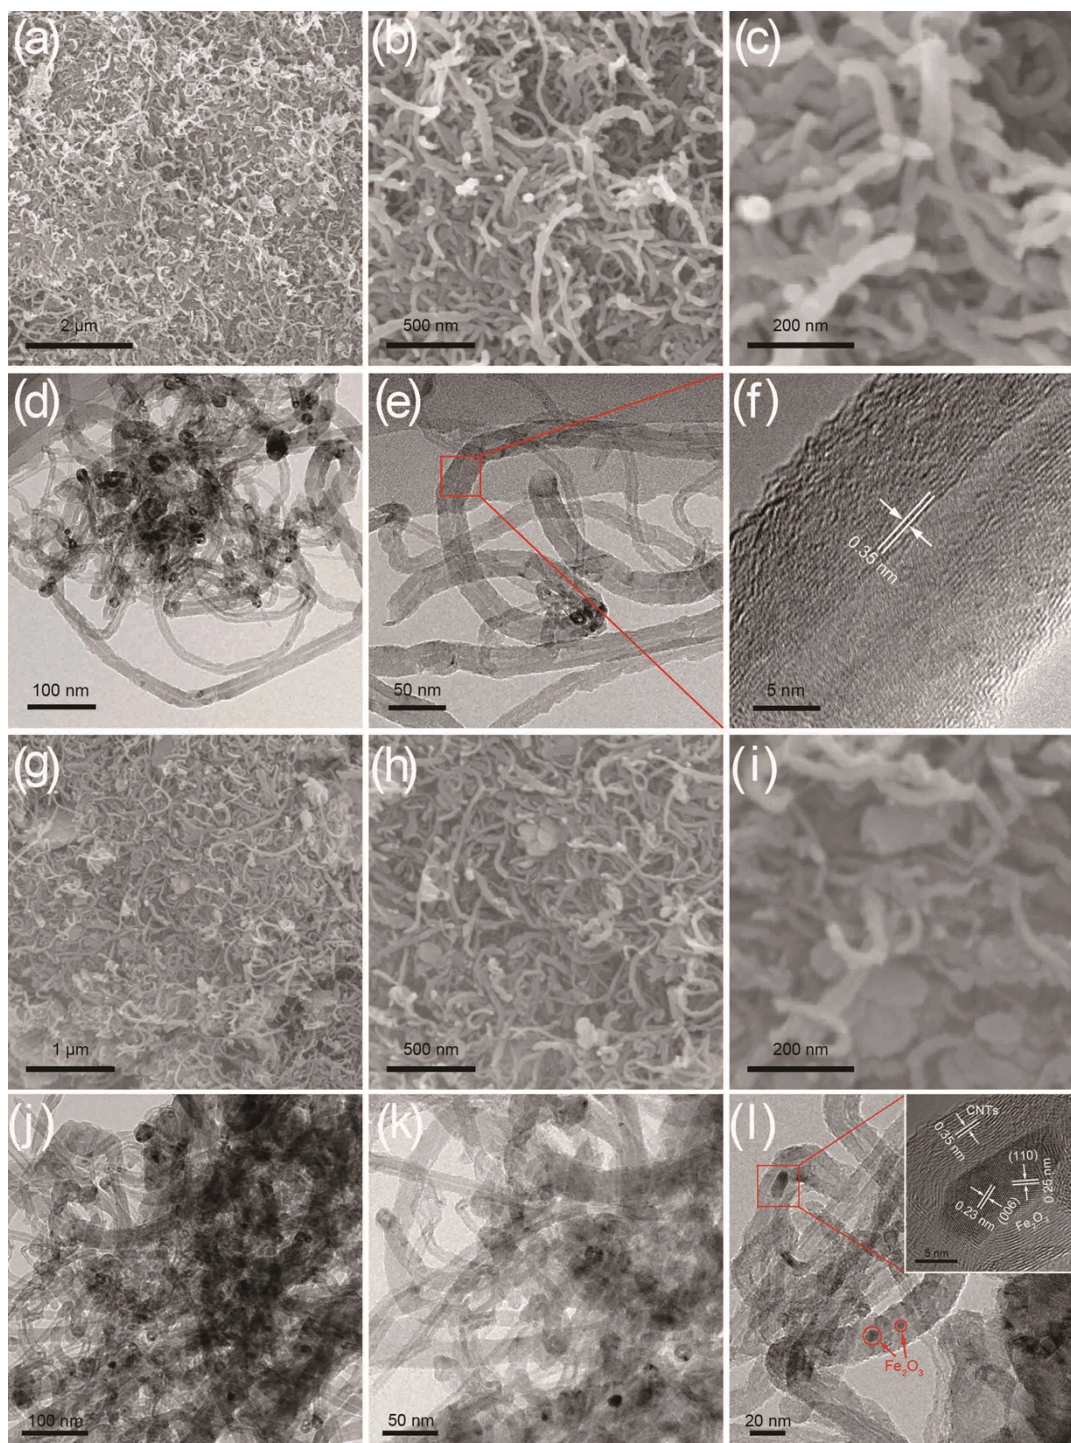

**Figure S1.** (a–c) SEM images, (d and e) TEM and (f) HRTEM images of acid-treated CNTs, and (g–i) SEM and (j–l) TEM images of Fe<sub>2</sub>O<sub>3</sub>/CNTs (the inset in (l) corresponding to the HRTEM image of selected area).

$$C_{\text{TFCs}} = C_{\text{CNTs}} \times W_{\text{CNTs}} + C_{\text{Fe}_2\text{O}_3} \times W_{\text{Fe}_2\text{O}_3} + C_{\text{TiO}_2} \times W_{\text{TiO}_2} \quad (\text{S1})$$

**Equation S1.** The theoretical capacity of TFCs could be calculated on the basis of the above equation. Here the theoretical capacities of CNTs, Fe<sub>2</sub>O<sub>3</sub> and TiO<sub>2</sub> are 372, 1005 and 335 mAh g<sup>-1</sup>, respectively. According to TGA and ICP analyses results, the

weight percents of CNTs, Fe<sub>2</sub>O<sub>3</sub> and TiO<sub>2</sub> in the composite TFCs are calculated to be 15.5%, 57.3% and 27.2%, respectively. Thus, the theoretical capacity of TFCs is 724.6 mAh g<sup>-1</sup>.

**Table S1.** Comparison of electrochemical performances of composites based on iron oxides and carbon nanotubes

| Ref.      | Component <sup>a</sup>                                   | Carbon content (wt %) | Rate capability (mA g <sup>-1</sup> ) | Specific capacity based on overall mass (mAh g <sup>-1</sup> ) | Current density (mA g <sup>-1</sup> ) | Cycle Number | Coulombic efficiency during cycling (%) | Voltage range (V) |
|-----------|----------------------------------------------------------|-----------------------|---------------------------------------|----------------------------------------------------------------|---------------------------------------|--------------|-----------------------------------------|-------------------|
| 1         | C/Fe <sub>3</sub> O <sub>4</sub> /MWCNTs                 | 33.3                  | –                                     | 656                                                            | 100                                   | 145          | –                                       | 0.02–3            |
| 2         | Fe <sub>2</sub> O <sub>3</sub> /MWCNTs                   | 1                     | 100–1000                              | 430                                                            | 100                                   | 100          | 98                                      | 0.01–3            |
| 3         | C/Fe <sub>3</sub> O <sub>4</sub> /CNTs                   | 14                    | 156–6250                              | 840                                                            | 390                                   | 100          | ~94                                     | 0.005–3           |
| 4         | Fe <sub>2</sub> O <sub>3</sub> /CNTs                     | 48.2                  | 60–1200                               | 811                                                            | 35                                    | 100          | –                                       | 0.02–2.5          |
| 5         | Fe <sub>2</sub> O <sub>3</sub> /SWCNTs                   | 12                    | 50–2500                               | 801                                                            | 500                                   | 90           | –                                       | 0.001–3           |
| 6         | Fe <sub>2</sub> O <sub>3</sub> /CNTs                     | 68.8                  | 50–2000                               | 633                                                            | 50                                    | 50           | –                                       | 0.005–2.5         |
| 7         | Fe <sub>2</sub> O <sub>3</sub> /CNTs                     | 55.2                  | 50–500                                | 619                                                            | 50                                    | 80           | –                                       | 0.01–3            |
| 8         | Fe <sub>3</sub> O <sub>4</sub> /CNTs                     | ~50                   | 90–9000                               | 836                                                            | 100                                   | 100          | 95                                      | 0.1–3             |
| 9         | C/Fe <sub>2</sub> O <sub>3</sub> /MWCNTs                 | 30                    | 500–3000                              | 820                                                            | 500                                   | 100          | 97–98                                   | 0.01–3            |
| This work | TiO <sub>2</sub> /Fe <sub>2</sub> O <sub>3</sub> /MWCNTs | 15.5                  | 50–10000                              | 922                                                            | 500                                   | 500          | 99                                      | 0.05–3            |
|           |                                                          |                       |                                       | 1089                                                           | 200                                   | 200          | 99                                      | 0.05–3            |

<sup>a</sup>C represents graphitized carbon formed by carbonization of precursor, Single-walled carbon nanotubes is denoted as SWCNTs, and Multi-walled carbon nanotubes is denoted as MWCNTs.

## References

1. Y. He, L. Huang, J. S. Cai, X. M. Zheng and S. G. Sun, *Electrochim. Acta*, 2010, **55**, 1140–1144.
2. Y. Huang, Z. Dong, D. Jia, Z. Guo and W. I. Cho, *Solid State Ionics*, 2011, **201**, 54–59.
3. X. Jia, Z. Chen, X. Cui, Y. Peng, X. Wang, G. Wang, F. Wei and Y. Lu, *ACS Nano*, 2012, **6**, 9911–9919.
4. W. J. Yu, P. X. Hou, F. Li and C. Liu, *J. Mater. Chem.*, 2012, **22**, 13756–13763.

5. G. Zhou, D. W. Wang, P. X. Hou, W. Li, N. Li, C. Liu, F. Li and H. M. Cheng, *J. Mater. Chem.*, 2012, **22**, 17942–17946.
6. J. Ma, F. Yu, Z. Wen, M. Yang, H. Zhou, C. Li, L. Jin, L. Zhou, L. Chen, Z. Yuan and J. Chen, *Dalton Trans.*, 2013, **42**, 1356–1359.
7. Y. Sun, J. Zhang, T. Huang, Z. Liu and A. Yu, *Int. J. Electrochem. Sci.*, 2013, **8**, 2918–2931.
8. Y. Wu, Y. Wei, J. Wang, K. Jiang and S. Fan, *Nano Lett.*, 2013, **13**, 818–823.
9. Z. Wang, D. Luan, S. Madhavi, Y. Hu and X. W. Lou, *Energy Environ. Sci.*, 2012, **5**, 5252–5256.
